# Supplementary material for: The Impact of Temperature and Ethanol Concentration on the Global Recovery of Specific Polyphenols in an Integrated HPLE/RP Process on Carménère Pomace Extracts
Source: PubMed Central journal article supplement (PMC6749334; doi:10.3390/molecules24173145), 2019-08-29
Supplement: molecules-24-03145-s001.pdf [file molecules-24-03145-s001.pdf]

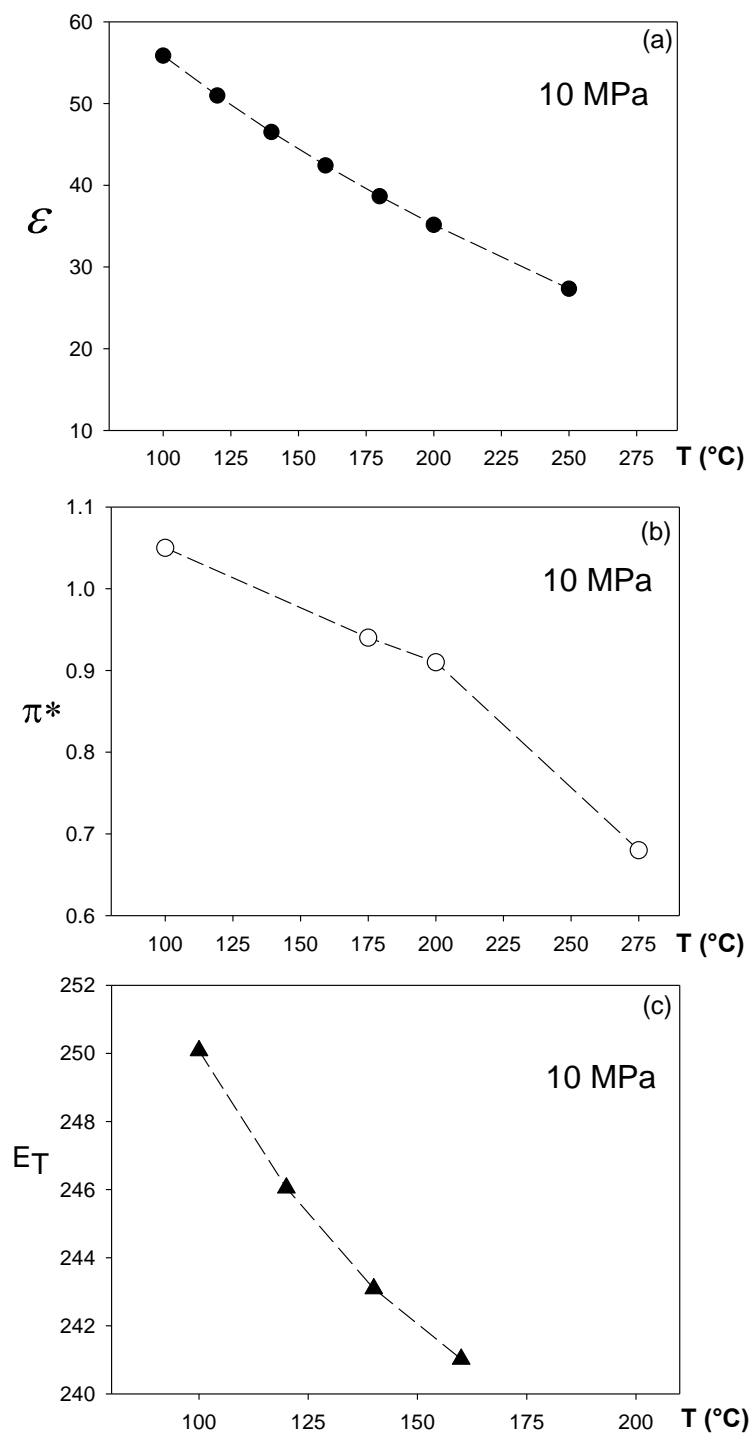

**Figure S1.** Water polarity expressed as dielectric constant ( $\epsilon$ ), polarity/polarizability ( $\pi^*$ ) and Reichardt's scale ( $E_T$ ) at pressure constant (10 MPa).

Adapted from Arched et al. (1989); Alghoul et al. (2017); Jessop et al. (2012); Lu et al. (2002)

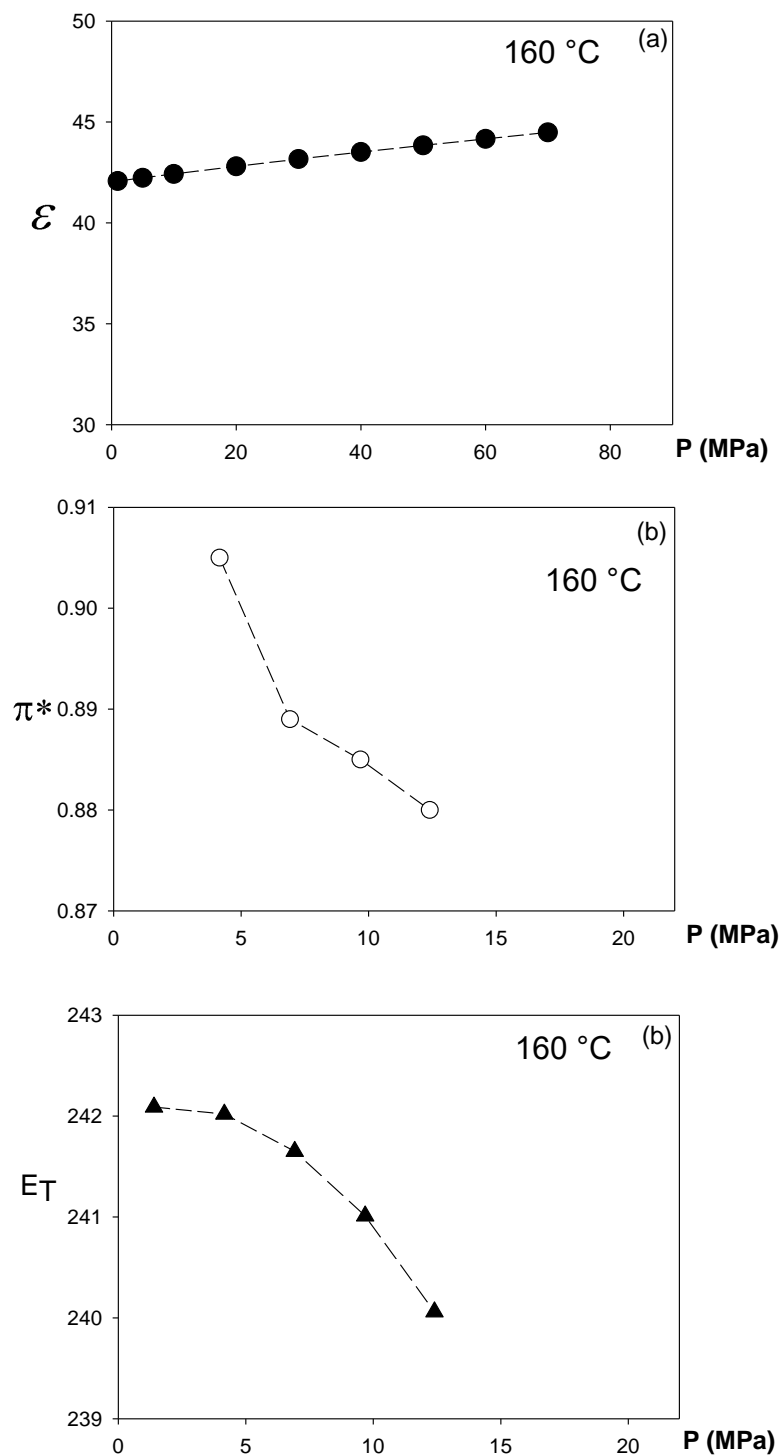

**Figure S2.** Water polarity expressed as dielectric constant ( $\epsilon$ ), polarity/polarizability ( $\pi^*$ ) and Reichardt's scale ( $E_T$ ) at temperature constant (160°C).

Adapted from Arched et al. (1989); Alghoul et al. (2017)
